# Supplementary material
Source: PubMed Central journal article supplement (PMC1297669)

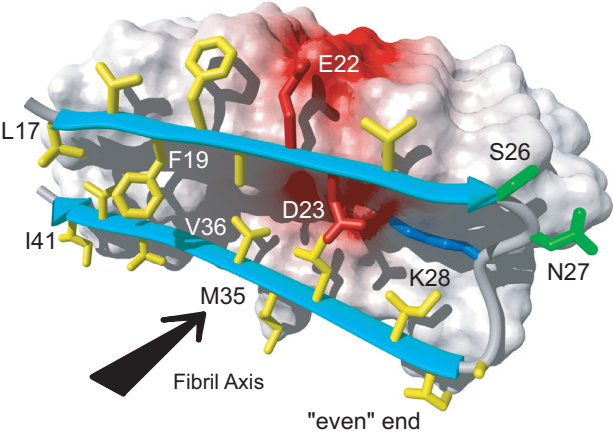

Supplement: pnas_0506723102_5.pdf [file pnas_0506723102_5.pdf]
